# Supplementary material for: Reference Values and Related Factors for Peak Expiratory Flow in Middle-Aged and Elderly Chinese
Source: Front Public Health. 2021 Aug 20;9:706524. doi: 10.3389/fpubh.2021.706524 (PMC8417711; doi:10.3389/fpubh.2021.706524)
Supplement: Supplementary file 1 [file Table_1.xlsx]

## Sheet: PEF males
Table 1s. Look up tables for PEF (males).
age	Msplie	Sspline	Lspline
40	-1.58722e-06	-9.7083e-06	0
40.25	-1.5615e-06	-9.42144e-06	0		M=100.4273-4.94*age+3.4654*height+Mspline
40.5	-1.53578e-06	-9.13459e-06	0		S=-1.914524+0.012432+Sspline
40.75	-1.51006e-06	-8.84774e-06	0		L=2.79311-0.02771+Lspline
41	-1.48435e-06	-8.56088e-06	0
41.25	-1.45863e-06	-8.27403e-06	0
41.5	-1.43291e-06	-7.98718e-06	-2.22045e-16
41.75	-1.40719e-06	-7.70033e-06	0
42	-1.38147e-06	-7.41347e-06	-2.22045e-16
42.25	-1.35576e-06	-7.12662e-06	0
42.5	-1.33004e-06	-6.83977e-06	-2.22045e-16
42.75	-1.30432e-06	-6.55291e-06	-2.22045e-16
43	-1.2786e-06	-6.26606e-06	-2.22045e-16
43.25	-1.25288e-06	-5.97925e-06	-2.22045e-16
43.5	-1.22717e-06	-5.69271e-06	-2.22045e-16
43.75	-1.20145e-06	-5.40669e-06	-2.22045e-16
44	-1.17574e-06	-5.12147e-06	-2.22045e-16
44.25	-1.15003e-06	-4.83729e-06	-2.22045e-16
44.5	-1.12433e-06	-4.55435e-06	-2.22045e-16
44.75	-1.09863e-06	-4.27283e-06	-2.22045e-16
45	-1.07294e-06	-3.99291e-06	-2.22045e-16
45.25	-1.04726e-06	-3.71484e-06	-2.22045e-16
45.5	-1.0216e-06	-3.43911e-06	-2.22045e-16
45.75	-9.95953e-07	-3.16628e-06	-4.44089e-16
46	-9.70338e-07	-2.89692e-06	-2.22045e-16
46.25	-9.44757e-07	-2.63157e-06	-4.44089e-16
46.5	-9.19216e-07	-2.37076e-06	-4.44089e-16
46.75	-8.9372e-07	-2.115e-06	-4.44089e-16
47	-8.68275e-07	-1.86481e-06	-4.44089e-16
47.25	-8.42887e-07	-1.62072e-06	-4.44089e-16
47.5	-8.17566e-07	-1.38331e-06	-4.44089e-16
47.75	-7.92323e-07	-1.15318e-06	-4.44089e-16
48	-7.67169e-07	-9.30928e-07	-4.44089e-16
48.25	-7.42115e-07	-7.17164e-07	-4.44089e-16
48.5	-7.17173e-07	-5.12585e-07	-4.44089e-16
48.75	-6.92356e-07	-3.17904e-07	-4.44089e-16
49	-6.67676e-07	-1.33833e-07	-4.44089e-16
49.25	-6.43144e-07	3.90029e-08	-4.44089e-16
49.5	-6.1877e-07	2.00337e-07	-4.44089e-16
49.75	-5.94562e-07	3.49989e-07	-4.44089e-16
50	-5.7053e-07	4.8778e-07	-4.44089e-16
50.25	-5.46681e-07	6.13593e-07	-6.66134e-16
50.5	-5.23022e-07	7.2756e-07	-6.66134e-16
50.75	-4.9956e-07	8.29877e-07	-6.66134e-16
51	-4.76301e-07	9.20738e-07	-6.66134e-16
51.25	-4.5325e-07	1.00034e-06	-6.66134e-16
51.5	-4.30415e-07	1.06886e-06	-6.66134e-16
51.75	-4.07801e-07	1.12651e-06	-6.66134e-16
52	-3.85414e-07	1.17346e-06	-6.66134e-16
52.25	-3.6326e-07	1.20996e-06	-6.66134e-16
52.5	-3.41342e-07	1.23643e-06	-6.66134e-16
52.75	-3.19663e-07	1.25331e-06	-6.66134e-16
53	-2.98226e-07	1.26108e-06	-6.66134e-16
53.25	-2.77034e-07	1.2602e-06	-6.66134e-16
53.5	-2.56092e-07	1.25108e-06	-8.88178e-16
53.75	-2.35402e-07	1.23414e-06	-6.66134e-16
54	-2.14967e-07	1.2098e-06	-8.88178e-16
54.25	-1.94792e-07	1.17857e-06	-6.66134e-16
54.5	-1.74876e-07	1.14137e-06	-8.88178e-16
54.75	-1.55221e-07	1.09923e-06	-6.66134e-16
55	-1.35827e-07	1.05318e-06	-8.88178e-16
55.25	-1.16694e-07	1.00426e-06	-8.88178e-16
55.5	-9.78218e-08	9.53579e-07	-8.88178e-16
55.75	-7.92112e-08	9.02257e-07	-8.88178e-16
56	-6.08618e-08	8.51416e-07	-8.88178e-16
56.25	-4.27742e-08	8.02095e-07	-8.88178e-16
56.5	-2.49505e-08	7.54997e-07	-8.88178e-16
56.75	-7.39371e-09	7.10743e-07	-8.88178e-16
57	9.89345e-09	6.69956e-07	-8.88178e-16
57.25	2.6908e-08	6.33239e-07	-1.11022e-15
57.5	4.36456e-08	6.01135e-07	-8.88178e-16
57.75	6.01018e-08	5.74169e-07	-1.11022e-15
58	7.6272e-08	5.52869e-07	-8.88178e-16
58.25	9.21521e-08	5.37687e-07	-1.11022e-15
58.5	1.07739e-07	5.28795e-07	-8.88178e-16
58.75	1.23032e-07	5.2629e-07	-1.11022e-15
59	1.38027e-07	5.3027e-07	-8.88178e-16
59.25	1.52722e-07	5.40698e-07	-1.11022e-15
59.5	1.67119e-07	5.5699e-07	-1.11022e-15
59.75	1.81218e-07	5.78427e-07	-1.11022e-15
60	1.9502e-07	6.0429e-07	-1.11022e-15
60.25	2.08525e-07	6.33889e-07	-1.11022e-15
60.5	2.21734e-07	6.66653e-07	-1.33227e-15
60.75	2.34647e-07	7.02042e-07	-1.11022e-15
61	2.47265e-07	7.39514e-07	-1.33227e-15
61.25	2.59587e-07	7.78575e-07	-1.11022e-15
61.5	2.71615e-07	8.18919e-07	-1.33227e-15
61.75	2.83349e-07	8.6029e-07	-1.11022e-15
62	2.9479e-07	9.02429e-07	-1.33227e-15
62.25	3.05939e-07	9.45078e-07	-1.11022e-15
62.5	3.16797e-07	9.87977e-07	-1.33227e-15
62.75	3.27364e-07	1.03087e-06	-1.11022e-15
63	3.37641e-07	1.07349e-06	-1.33227e-15
63.25	3.4763e-07	1.11558e-06	-1.11022e-15
63.5	3.57329e-07	1.15679e-06	-1.33227e-15
63.75	3.6674e-07	1.1968e-06	-1.11022e-15
64	3.75864e-07	1.23524e-06	-1.33227e-15
64.25	3.847e-07	1.27177e-06	-1.55431e-15
64.5	3.93249e-07	1.30597e-06	-1.33227e-15
64.75	4.01511e-07	1.33744e-06	-1.55431e-15
65	4.09486e-07	1.36576e-06	-1.33227e-15
65.25	4.17175e-07	1.39055e-06	-1.55431e-15
65.5	4.24578e-07	1.41158e-06	-1.33227e-15
65.75	4.31695e-07	1.42868e-06	-1.55431e-15
66	4.38527e-07	1.44166e-06	-1.33227e-15
66.25	4.45072e-07	1.45037e-06	-1.55431e-15
66.5	4.51331e-07	1.45483e-06	-1.33227e-15
66.75	4.57303e-07	1.45509e-06	-1.55431e-15
67	4.62987e-07	1.4512e-06	-1.33227e-15
67.25	4.68384e-07	1.44319e-06	-1.55431e-15
67.5	4.73494e-07	1.43106e-06	-1.33227e-15
67.75	4.78316e-07	1.41478e-06	-1.55431e-15
68	4.82852e-07	1.39433e-06	-1.55431e-15
68.25	4.87102e-07	1.36967e-06	-1.55431e-15
68.5	4.91069e-07	1.34069e-06	-1.55431e-15
68.75	4.94757e-07	1.30729e-06	-1.55431e-15
69	4.9817e-07	1.26936e-06	-1.77636e-15
69.25	5.01311e-07	1.22677e-06	-1.55431e-15
69.5	5.04184e-07	1.17941e-06	-1.77636e-15
69.75	5.06791e-07	1.12715e-06	-1.55431e-15
70	5.09136e-07	1.06989e-06	-1.77636e-15
70.25	5.11222e-07	1.00754e-06	-1.55431e-15
70.5	5.13055e-07	9.40211e-07	-1.77636e-15
70.75	5.14643e-07	8.68075e-07	-1.55431e-15
71	5.15991e-07	7.91289e-07	-1.77636e-15
71.25	5.17106e-07	7.10022e-07	-1.77636e-15
71.5	5.17994e-07	6.24488e-07	-1.77636e-15
71.75	5.18664e-07	5.34907e-07	-1.77636e-15
72	5.1912e-07	4.41503e-07	-1.77636e-15
72.25	5.19371e-07	3.44464e-07	-1.77636e-15
72.5	5.19423e-07	2.43842e-07	-1.77636e-15
72.75	5.19283e-07	1.39658e-07	-1.77636e-15
73	5.18958e-07	3.19291e-08	-1.77636e-15
73.25	5.18455e-07	-7.93427e-08	-1.77636e-15
73.5	5.17782e-07	-1.94232e-07	-2.22045e-15
73.75	5.16945e-07	-3.12834e-07	-1.77636e-15
74	5.15953e-07	-4.3524e-07	-1.77636e-15
74.25	5.14811e-07	-5.61543e-07	-1.77636e-15
74.5	5.13528e-07	-6.91824e-07	-2.22045e-15
74.75	5.1211e-07	-8.26162e-07	-2.22045e-15
75	5.10563e-07	-9.64636e-07	-1.77636e-15
75.25	5.08895e-07	-1.10733e-06	-1.77636e-15
75.5	5.0711e-07	-1.25436e-06	-2.22045e-15
75.75	5.05214e-07	-1.40584e-06	-2.22045e-15
76	5.03214e-07	-1.56188e-06	-1.77636e-15
76.25	5.01113e-07	-1.7226e-06	-1.77636e-15
76.5	4.98918e-07	-1.88811e-06	-2.22045e-15
76.75	4.96634e-07	-2.05852e-06	-2.22045e-15
77	4.94268e-07	-2.23394e-06	-1.77636e-15
77.25	4.91824e-07	-2.41445e-06	-1.77636e-15
77.5	4.89306e-07	-2.60008e-06	-2.22045e-15
77.75	4.86719e-07	-2.79084e-06	-2.22045e-15
78	4.84067e-07	-2.98673e-06	-1.77636e-15
78.25	4.81353e-07	-3.18777e-06	-2.22045e-15
78.5	4.78582e-07	-3.39396e-06	-2.22045e-15
78.75	4.75758e-07	-3.60534e-06	-2.22045e-15
79	4.72885e-07	-3.82193e-06	-2.22045e-15
79.25	4.69966e-07	-4.04374e-06	-2.22045e-15
79.5	4.67006e-07	-4.2707e-06	-2.22045e-15
79.75	4.64008e-07	-4.50275e-06	-2.22045e-15
80	4.60974e-07	-4.7398e-06	-2.22045e-15
80.25	4.57908e-07	-4.9818e-06	-2.22045e-15
80.5	4.54813e-07	-5.22867e-06	-2.22045e-15
80.75	4.51692e-07	-5.48037e-06	-2.22045e-15
81	4.48547e-07	-5.73685e-06	-2.22045e-15
81.25	4.45383e-07	-5.99803e-06	-2.22045e-15
81.5	4.42201e-07	-6.26372e-06	-2.22045e-15
81.75	4.39004e-07	-6.53374e-06	-2.22045e-15
82	4.35796e-07	-6.80788e-06	-2.22045e-15
82.25	4.32579e-07	-7.08594e-06	-2.66454e-15
82.5	4.29356e-07	-7.36773e-06	-2.22045e-15
82.75	4.26129e-07	-7.65304e-06	-2.22045e-15
83	4.22901e-07	-7.94167e-06	-2.66454e-15
83.25	4.19676e-07	-8.23341e-06	-2.66454e-15
83.5	4.16456e-07	-8.52803e-06	-2.22045e-15
83.75	4.13242e-07	-8.82527e-06	-2.22045e-15
84	4.10038e-07	-9.12488e-06	-2.66454e-15
84.25	4.06845e-07	-9.42663e-06	-2.66454e-15
84.5	4.03663e-07	-9.73033e-06	-2.22045e-15
84.75	4.00493e-07	-1.00358e-05	-2.22045e-15
85	3.97333e-07	-1.0343e-05	-2.66454e-15

## Sheet: PEF females
Table 1s. Look up tables for PEF (females).
age	Msplie	Sspline	Lspline
40	-27.0594	-1.29324e-06	2.33147e-15
40.25	-26.1759	-1.23223e-06	2.44249e-15		M=66.9815-2.7342*age+2.3084*height+Mspline
40.5	-25.2929	-1.17119e-06	2.44249e-15		S=-1.567612+0.006986*age+Ssplie
40.75	-24.4106	-1.11008e-06	2.55351e-15		L=1.810394-0.021583+Lsplie
41	-23.5296	-1.04888e-06	2.55351e-15
41.25	-22.6501	-9.87549e-07	2.66454e-15
41.5	-21.7722	-9.26052e-07	2.77556e-15
41.75	-20.8963	-8.64357e-07	2.88658e-15
42	-20.0222	-8.02429e-07	2.9976e-15
42.25	-19.1503	-7.40245e-07	3.10862e-15
42.5	-18.2808	-6.77827e-07	3.10862e-15
42.75	-17.4139	-6.15208e-07	3.21965e-15
43	-16.5499	-5.52423e-07	3.33067e-15
43.25	-15.6892	-4.89508e-07	3.33067e-15
43.5	-14.832	-4.26507e-07	3.44169e-15
43.75	-13.9786	-3.63469e-07	3.55271e-15
44	-13.1292	-3.00442e-07	3.66374e-15
44.25	-12.2843	-2.37476e-07	3.77476e-15
44.5	-11.444	-1.74623e-07	3.77476e-15
44.75	-10.6086	-1.11941e-07	3.88578e-15
45	-9.77861	-4.94854e-08	3.88578e-15
45.25	-8.95431	1.26381e-08	3.9968e-15
45.5	-8.13677	7.41242e-08	4.10783e-15
45.75	-7.32715	1.34617e-07	4.10783e-15
46	-6.52664	1.93762e-07	4.32987e-15
46.25	-5.73638	2.51196e-07	4.44089e-15
46.5	-4.95754	3.06522e-07	4.44089e-15
46.75	-4.19127	3.59339e-07	4.44089e-15
47	-3.43873	4.09242e-07	4.66294e-15
47.25	-2.70106	4.55865e-07	4.88498e-15
47.5	-1.9794	4.98991e-07	4.66294e-15
47.75	-1.27487	5.38437e-07	4.88498e-15
48	-0.588606	5.74023e-07	4.88498e-15
48.25	0.0783044	6.05668e-07	5.10703e-15
48.5	0.724856	6.33697e-07	5.10703e-15
48.75	1.35007	6.58533e-07	5.10703e-15
49	1.95298	6.80604e-07	5.10703e-15
49.25	2.53258	7.00326e-07	5.32907e-15
49.5	3.08779	7.18086e-07	5.55112e-15
49.75	3.61752	7.34265e-07	5.55112e-15
50	4.12066	7.49242e-07	5.55112e-15
50.25	4.59621	7.63363e-07	5.55112e-15
50.5	5.04349	7.76836e-07	5.77316e-15
50.75	5.46192	7.89832e-07	5.77316e-15
51	5.85093	8.02525e-07	5.9952e-15
51.25	6.21002	8.15049e-07	6.21725e-15
51.5	6.53904	8.2739e-07	5.9952e-15
51.75	6.83794	8.39493e-07	6.21725e-15
52	7.10663	8.51307e-07	6.21725e-15
52.25	7.34502	8.62791e-07	6.43929e-15
52.5	7.55283	8.73955e-07	6.43929e-15
52.75	7.72973	8.84823e-07	6.43929e-15
53	7.87541	8.95417e-07	6.43929e-15
53.25	7.98974	9.05723e-07	6.66134e-15
53.5	8.0734	9.15575e-07	6.88338e-15
53.75	8.12725	9.24769e-07	6.88338e-15
54	8.15218	9.33104e-07	7.10543e-15
54.25	8.14909	9.40367e-07	6.88338e-15
54.5	8.11912	9.4631e-07	7.10543e-15
54.75	8.06346	9.50677e-07	7.10543e-15
55	7.98328	9.53209e-07	7.32747e-15
55.25	7.87976	9.53652e-07	7.32747e-15
55.5	7.754	9.5176e-07	7.32747e-15
55.75	7.6071	9.47287e-07	7.54952e-15
56	7.44015	9.39987e-07	7.54952e-15
56.25	7.25419	9.29622e-07	7.77156e-15
56.5	7.05008	9.15971e-07	7.77156e-15
56.75	6.8286	8.98819e-07	7.77156e-15
57	6.59056	8.77952e-07	7.77156e-15
57.25	6.33675	8.5315e-07	7.99361e-15
57.5	6.06788	8.24173e-07	7.99361e-15
57.75	5.78469	7.90774e-07	8.21565e-15
58	5.48789	7.5271e-07	8.21565e-15
58.25	5.17824	7.09755e-07	8.21565e-15
58.5	4.85674	6.61767e-07	8.43769e-15
58.75	4.52439	6.08625e-07	8.43769e-15
59	4.18224	5.50209e-07	8.65974e-15
59.25	3.83146	4.86458e-07	8.65974e-15
59.5	3.47378	4.17554e-07	8.65974e-15
59.75	3.11108	3.43738e-07	8.88178e-15
60	2.74525	2.65254e-07	8.88178e-15
60.25	2.37818	1.8234e-07	9.10383e-15
60.5	2.0118	9.52241e-08	9.10383e-15
60.75	1.64807	4.13095e-09	9.10383e-15
61	1.28893	-9.07151e-08	9.10383e-15
61.25	0.9362	-1.89116e-07	9.32587e-15
61.5	0.591043	-2.90976e-07	9.32587e-15
61.75	0.254488	-3.96228e-07	9.54792e-15
62	-0.0724394	-5.04804e-07	9.76996e-15
62.25	-0.388874	-6.1666e-07	9.54792e-15
62.5	-0.69459	-7.31863e-07	9.76996e-15
62.75	-0.989524	-8.50502e-07	9.76996e-15
63	-1.27361	-9.72669e-07	9.99201e-15
63.25	-1.54674	-1.09845e-06	9.99201e-15
63.5	-1.80863	-1.22794e-06	9.99201e-15
63.75	-2.05893	-1.36121e-06	9.99201e-15
64	-2.29733	-1.49834e-06	1.02141e-14
64.25	-2.52356	-1.63939e-06	1.04361e-14
64.5	-2.73776	-1.78429e-06	1.04361e-14
64.75	-2.94011	-1.93292e-06	1.04361e-14
65	-3.13084	-2.08519e-06	1.04361e-14
65.25	-3.31015	-2.24098e-06	1.06581e-14
65.5	-3.47836	-2.40014e-06	1.06581e-14
65.75	-3.63582	-2.56251e-06	1.08802e-14
66	-3.78284	-2.72791e-06	1.06581e-14
66.25	-3.91977	-2.89619e-06	1.08802e-14
66.5	-4.0469	-3.0672e-06	1.11022e-14
66.75	-4.16454	-3.24077e-06	1.11022e-14
67	-4.27298	-3.41676e-06	1.13243e-14
67.25	-4.3725	-3.59479e-06	1.13243e-14
67.5	-4.46322	-3.7735e-06	1.13243e-14
67.75	-4.54527	-3.95134e-06	1.13243e-14
68	-4.61873	-4.12673e-06	1.15463e-14
68.25	-4.68373	-4.29808e-06	1.15463e-14
68.5	-4.74033	-4.46379e-06	1.17684e-14
68.75	-4.78863	-4.62221e-06	1.17684e-14
69	-4.82871	-4.77173e-06	1.17684e-14
69.25	-4.86067	-4.91075e-06	1.19904e-14
69.5	-4.88465	-5.03783e-06	1.19904e-14
69.75	-4.90082	-5.15157e-06	1.22125e-14
70	-4.90933	-5.25059e-06	1.22125e-14
70.25	-4.91039	-5.33361e-06	1.22125e-14
70.5	-4.90438	-5.39994e-06	1.24345e-14
70.75	-4.8917	-5.44902e-06	1.24345e-14
71	-4.87278	-5.48027e-06	1.26565e-14
71.25	-4.84803	-5.49311e-06	1.26565e-14
71.5	-4.81783	-5.48678e-06	1.26565e-14
71.75	-4.78255	-5.46049e-06	1.26565e-14
72	-4.74258	-5.41344e-06	1.28786e-14
72.25	-4.6983	-5.34494e-06	1.28786e-14
72.5	-4.65011	-5.25469e-06	1.31006e-14
72.75	-4.59841	-5.14247e-06	1.31006e-14
73	-4.5436	-5.00808e-06	1.31006e-14
73.25	-4.48609	-4.85138e-06	1.33227e-14
73.5	-4.42628	-4.67268e-06	1.33227e-14
73.75	-4.36459	-4.47233e-06	1.35447e-14
74	-4.30142	-4.2507e-06	1.33227e-14
74.25	-4.23718	-4.00815e-06	1.35447e-14
74.5	-4.17231	-3.74488e-06	1.35447e-14
74.75	-4.10723	-3.4611e-06	1.37668e-14
75	-4.04239	-3.15697e-06	1.39888e-14
75.25	-3.97817	-2.83278e-06	1.39888e-14
75.5	-3.91486	-2.48912e-06	1.39888e-14
75.75	-3.85268	-2.12667e-06	1.39888e-14
76	-3.79186	-1.74612e-06	1.42109e-14
76.25	-3.73262	-1.34817e-06	1.42109e-14
76.5	-3.67513	-9.33617e-07	1.44329e-14
76.75	-3.61956	-5.03288e-07	1.42109e-14
77	-3.56608	-5.80035e-08	1.44329e-14
77.25	-3.51483	4.01418e-07	1.46549e-14
77.5	-3.46602	8.74179e-07	1.46549e-14
77.75	-3.41982	1.35949e-06	1.4877e-14
78	-3.37644	1.85655e-06	1.4877e-14
78.25	-3.33589	2.36464e-06	1.4877e-14
78.5	-3.29761	2.88327e-06	1.4877e-14
78.75	-3.26088	3.41202e-06	1.5099e-14
79	-3.22496	3.95048e-06	1.53211e-14
79.25	-3.18912	4.49822e-06	1.53211e-14
79.5	-3.1526	5.05482e-06	1.53211e-14
79.75	-3.11465	5.61986e-06	1.53211e-14
80	-3.07449	6.19292e-06	1.55431e-14
80.25	-3.03139	6.77357e-06	1.55431e-14
80.5	-2.98466	7.36144e-06	1.57652e-14
80.75	-2.93365	7.95613e-06	1.55431e-14
81	-2.87768	8.55727e-06	1.57652e-14
81.25	-2.81617	9.16449e-06	1.59872e-14
81.5	-2.74876	9.77753e-06	1.59872e-14
81.75	-2.67521	1.03962e-05	1.62093e-14
82	-2.59522	1.10202e-05	1.59872e-14
82.25	-2.50851	1.16493e-05	1.62093e-14
82.5	-2.41471	1.22832e-05	1.62093e-14
82.75	-2.31345	1.29218e-05	1.64313e-14
83	-2.20433	1.35648e-05	1.64313e-14
83.25	-2.08702	1.42118e-05	1.66533e-14
83.5	-1.96139	1.48627e-05	1.66533e-14
83.75	-1.82736	1.55172e-05	1.66533e-14
84	-1.68485	1.61751e-05	1.68754e-14
84.25	-1.53384	1.68361e-05	1.68754e-14
84.5	-1.37451	1.75e-05	1.70974e-14
84.75	-1.20713	1.81665e-05	1.68754e-14
85	-1.03192	1.88354e-05	1.70974e-14
